# Supplementary material for: Blood and Bronchoalveolar Lavage Fluid Metagenomic Next-Generation Sequencing in Pneumonia
Source: Can J Infect Dis Med Microbiol. 2020 Aug 12;2020:6839103. doi: 10.1155/2020/6839103 (PMC7448216; doi:10.1155/2020/6839103)
Supplement: Supplementary Materials — Figure S1: the amount of sequencing data produced by BALF and blood mNGS. Table S1: reference index of established lower respiratory tract pathogens. Table S2: BALF and blood mNGS and culture results for bacteria and fungi of 39 patients. [file 6839103.f1.zip]

Archive with 3 entries (3 files):
- 6839103.f1/Fig S1.docx
- 6839103.f1/Table S1.xlsx
- 6839103.f1/Table S2.xlsx
