# Supplementary material for: Blood and Bronchoalveolar Lavage Fluid Metagenomic Next-Generation Sequencing in Pneumonia
Source: Can J Infect Dis Med Microbiol. 2020 Aug 12;2020:6839103. doi: 10.1155/2020/6839103 (PMC7448216; doi:10.1155/2020/6839103)
Supplement: Supplementary Materials — Figure S1: the amount of sequencing data produced by BALF and blood mNGS. Table S1: reference index of established lower respiratory tract pathogens. Table S2: BALF and blood mNGS and culture results for bacteria and fungi of 39 patients. [file 6839103.f1.zip › 6839103.f1/Table S1.xlsx]

## Sheet: Sheet1
Table S1 Reference Index of Established Lower Respiratory Tract Pathogens
Bacteria and Fungi	Ref
Acinetobacter baumannii	1
Bacteroides fragilis	2,3
Bordatella pertussis	3
Burkholderia cepacia	3
Burkholderia pseudomallei	3
Chlamydophila pneumoniae	2
Chlamydophila psittaci	2
Citrobacter fruendii	1,2
Citrobacter koseri	1,2
Coxiella burnetii	3
Enterobacter aerogenes	1,2
Enterobacter cloacae	1,2
Enterococcus faecium	7
Escherichia coli	1,2
Francisella tularemia	3
Fusobacterium necrophorum	2,3
Fusobacterium nucleatum	2,3
Haemophilus influenzae	2,3
Klebsiella oxytoca	1
Klebsiella pneumoniae	1
Legionella pneumophila	2,3
Moraxella catarrhalis	3
Morganella morganii	2
Mycobacterium tuberculosis	2,3
Mycoplasma pneumoniae	2,3
Nocardia spp.	5
Pasteruella multocida	3
Proteus mirabilis	1
Pseudomonas aeruginosa	1-4
Ralstonia pickettii	8
Serratia marcescens	1,2
Stenotrophomonas maltophilia	1
Streptococcus pneumoniae	1-4
Streptococcus pyogenes	2
Streptococcus viridans group (S. anginosus, S. intermedius, S. constellatus)	2,3
Staphylococcus aureus	1-4
Viruses
Cytomegalovirus	5
Epstein - Barr virus	9
Human adenovirus	2,3
Human coronavirus	2,3
Human metapneumovirus	2,3
Human parainfluenza virus	2,3
Human respiratory syncytial virus	2,3
Human rhinovirus	2,3
Influenza virus (Influenza A, Influenza B, Influenza C)	2,3
Respiratory syncytial virus	2,3
Fungi
Aspergillus flavus	5
Aspergillus fumigatus	5
Aspergillus niger	5
Aspergillus terreus	5
Candida albicans	6
Candida tropicalis	6
Candida parapsilosis	6
Candida glabrat	6
Candida krusei	6
Candida lusitaniae	6
Cryptococcus gatii	5
Cryptococcus neoformans	5
Coccidioides imitis	2,3
Coccidioides posadisii	2,3
Histoplasma capsulatum	2,3
Blastomyces dermatitidis	2,3
Pneumocystis jirovecii	5
Rhizopus, Mucor and Rhizomucor spp.	5
References
1. N Engl J Med 2014;370:1198-208.
2. N Engl J Med. 2015 Jul 30;373(5):415-27.
3. Clin Infect Dis (2007) 44 (Supplement_2): S27-S72.
4. N Engl J Med. 2008 Nov 27;359(22):2355-55.
5. Am J Transplant. 2017 Apr;17(4):855-879.
6. Am J Respir Crit Care Med. 2011
7. Infection. 2009. 37(1): 60-4.
8. J Med Case Rep. 2011. 5: 377.
9. Ulster Med J. 2009. 78(2): 137-8.
Adapted from Proc Natl Acad Sci U S A. 2018. 115(52): E12353-E12362.
