# Supplementary material for: Blood and Bronchoalveolar Lavage Fluid Metagenomic Next-Generation Sequencing in Pneumonia
Source: Can J Infect Dis Med Microbiol. 2020 Aug 12;2020:6839103. doi: 10.1155/2020/6839103 (PMC7448216; doi:10.1155/2020/6839103)
Supplement: Supplementary Materials — Figure S1: the amount of sequencing data produced by BALF and blood mNGS. Table S1: reference index of established lower respiratory tract pathogens. Table S2: BALF and blood mNGS and culture results for bacteria and fungi of 39 patients. [file 6839103.f1.zip › 6839103.f1/Table S2.xlsx]

## Sheet: Sheet1
Table S2 BALF and blood mNGS and culture results for bacteria and fungi of 39 patients
Patient ID	BALF mNGS		Blood mNGS		culture result
Patients with paired positive culture result
02	Acinetobacter baumannii	23105	Acinetobacter baumannii	40	Acinetobacter baumannii
	Mycobacterium tuberculosis complex group	10	Mycobacterium tuberculosis complex group	9	Mycobacterium tuberculosis
04	Acinetobacter baumannii	18	Ralstonia pickettii	3	Acinetobacter baumannii
08	Stenotrophomonas maltophilia	313	Candida albicans	12	Stenotrophomonas maltophilia
	Candida albicans	25			Candida albicans
09	Klebsiella pneumoniae	1357	-		Klebsiella pneumoniae
10	Candida parapsilosis	164	-		Candida parapsilosis
	Aspergillus flavus	13			Aspergillus flavus
13	Aspergillus fumigatus	200	Candida parapsilosis	30	Aspergillus fumigatus
14	Enterococcus faecium	149	Enterococcus faecium	4	Burkholderia cepacia
16	Enterococcus faecium	379	-		Candida albicans
	Candida albicans	27
18	Acinetobacter baumannii	777	Acinetobacter baumannii	63	Stenotrophomonas maltophilia
	Stenotrophomonas maltophilia	35			Pseudomonas aeruginosa
19	Acinetobacter baumannii	144	Acinetobacter baumannii	32	Pseudomonas aeruginosa
	Pseudomonas aeruginosa	32
	Streptococcus pneumoniae	8
	Candida glabrata	4
20	Acinetobacter baumannii	240	Acinetobacter baumannii	12	Acinetobacter baumannii
					Candida albicans
21	Enterococcus faecium	11	Enterococcus faecium	23	Ralstonia pickettii
26	Haemophilus influenzae	653	-		Haemophilus influenzae
29	Candida albicans	10	-		Candida albicans
31	Klebsiella pneumoniae	3670	Klebsiella pneumoniae	588	Pseudomonas aeruginosa
	Haemophilus influenzae	52	Enterococcus faecium	3
	Pneumocystis jirovecii	55	Aspergillus fumigatus	3
34	Klebsiella pneumoniae	6333	Klebsiella pneumoniae	11	Klebsiella pneumoniae
			Pseudomonas aeruginosa	43
Patients with paired negative culture result
01	-		-		-
07	-		-		-
11	-		-		-
12	-		-		-
17	Enterococcus faecium	17	Candida parapsilosis	7	-
22	-		-		-
23	-		-		-
24	Pseudomonas aeruginosa	3	-		-
25	-		-		-
27	-		-		-
28	-		-		-
32	-		-		-
35	Pneumocystis jirovecii	881	Pneumocystis jirovecii	391	-
Patients without paired culture result
03	Stenotrophomonas maltophilia	14	-		NT
	Candida albicans	6
05	Candida tropicalis	5	-		NT
06	-		Pneumocystis jirovecii	40	NT
15	-		-		NT
30	Candida tropicalis	49	-		NT
	Candida glabrata	4
33	Pneumocystis jirovecii	123887	Pneumocystis jirovecii	417	NT
	Acinetobacter baumannii	553
	Escherichia coli	27
36	-		-		NT
37	-		Acinetobacter baumannii	6	NT
38	-		-		NT
39	-		-		NT
Abrreviations: BALF, bronchoalveolar lavage fluid; mNGS, metagenomic next-generation sequencing; -, negative result; NT, not test.
